# Supplementary material
Source: PubMed Central journal article supplement (PMC5360901)
Supplement: rsta20160202supp1.pdf [file rsta20160202supp1.pdf]

# Supporting Information for: Insights into the Deactivation of 5-Bromouracil after UV Excitation

Francesca Peccati,\*

Sebastian Mai,†

Leticia González†

November 2, 2016

## MS-CASPT2 Geometries

The following geometries of 5-bromouracil were optimized with MS-CASPT2(12,9)/ANO-RCC-VDZP. For state-averaging and multi-state treatment, four singlets or three triplets were used. The calculations were done with MOLCAS 8.0, using an IPEA shift of zero, an imaginary level shift of 0.3 a.u., and the Douglas-Kroll-Hess scalar-relativistic Hamiltonian.

12  
S0 min -3017.895875  
C +2.593512 -0.222280 +0.038020  
N +1.817239 -1.374052 +0.106087  
N +1.820018 +0.928609 +0.016124  
C +0.420515 +1.060202 +0.036590  
C -0.276129 -0.221097 +0.104128  
C +0.445075 -1.374668 +0.137672  
O +3.809942 -0.230391 +0.000890  
O -0.095280 +2.172358 -0.005543  
H +2.341064 +1.798650 -0.039884  
H -0.025820 -2.348442 +0.187033  
H +2.332546 -2.243385 +0.126974  
Br -2.161345 -0.225354 +0.151685

12  
S1 min -3017.744217  
C +2.577804 -0.220493 +0.048783  
N +1.822291 -1.366540 +0.125086  
N +1.825424 +0.953874 +0.071580  
C +0.432186 +0.959745 +0.047299  
C -0.273703 -0.210910 +0.098812  
C +0.423043 -1.426108 +0.144118  
O +3.800354 -0.208315 -0.019216  
O -0.093784 +2.211681 +0.007893  
H +2.344346 +1.806094 -0.093610  
H -0.040283 -2.398408 +0.190024  
H +2.364984 -2.218696 +0.114489  
Br -2.161324 -0.161773 +0.124516

12  
T1 min -3017.786734  
C +2.499331 -0.231593 -0.099666  
N +1.732554 -1.384696 -0.033702  
N +1.812776 +0.923500 +0.285298  
C +0.421713 +1.095003 +0.189546  
C -0.293909 -0.176691 +0.248591  
C +0.490247 -1.379361 +0.580637  
O +3.669919 -0.223411 -0.447543  
O -0.075167 +2.200676 +0.072047  
H +2.357644 +1.776040 +0.198077  
H +0.041483 -2.325239 +0.845078  
H +2.240934 -2.238646 -0.228181  
Br -1.876188 -0.315430 -0.750410

12  
S2S1 CoIn -3017.740644 & -3017.740562  
C +2.602825 -0.130131 -0.010764  
N +1.851709 -1.296877 +0.057084  
N +1.874572 +1.013291 +0.323128  
C +0.461426 +1.059319 +0.151578  
C -0.230134 -0.139362 +0.238188  
C +0.491333 -1.359579 +0.340157  
O +3.794219 -0.138639 -0.287726  
O -0.034278 +2.247471 -0.078423  
H +2.364169 +1.880308 +0.128134  
H +0.049789 -2.327331 +0.520621  
H +2.384101 -2.143333 -0.118367  
Br -2.104540 -0.178272 +0.099673

\*Departament de Química, Universitat Autònoma de Barcelona, 08193 Bellaterra, Spain

†Institute of Theoretical Chemistry, Faculty of Chemistry, University of Vienna, Währinger Straße 17, 1090 Vienna, Austria

12  
 S1S0 CoIn -3017.743518 & -3017.743082  
 C +1.958439 -0.237647 -0.312087  
 N +1.277050 -1.355149 +0.318549  
 N +1.567098 +0.977143 +0.166224  
 C +0.208320 +1.317503 +0.548945  
 C -0.580797 +0.130594 +0.975619  
 C +0.358292 -1.073708 +1.209022  
 O +2.867209 -0.470314 -1.077274  
 O -0.088772 +2.472018 +0.495973  
 H +2.084834 +1.758582 -0.221988  
 H +0.224230 -1.759596 +2.043254  
 H +1.715915 -2.261891 +0.157601  
 Br -1.400332 -0.298246 -0.731076

12  
 S1T2 MXP -3017.739802 & -3017.740501  
 C +2.595622 -0.214758 +0.045562  
 N +1.803785 -1.362209 +0.106812  
 N +1.807845 +0.943051 +0.006083  
 C +0.437529 +0.926977 +0.041314  
 C -0.274910 -0.202139 +0.102601  
 C +0.437492 -1.429393 +0.130401  
 O +3.831481 -0.219290 +0.017289  
 O -0.071971 +2.236513 -0.004470  
 H +2.302539 +1.825280 -0.055395  
 H -0.029713 -2.401319 +0.186206  
 H +2.344053 -2.220627 +0.125332  
 Br -2.162415 -0.161934 +0.158037

12  
 T2T1 CoIn -3017.744857 & -3017.744344  
 C +2.568862 -0.214887 -0.014905  
 N +1.815637 -1.362883 -0.028394  
 N +1.819151 +0.966966 +0.018139  
 C +0.423228 +0.988835 +0.107446  
 C -0.273986 -0.222422 +0.154128  
 C +0.423104 -1.398069 +0.160784  
 O +3.791323 -0.198527 -0.015069  
 O -0.050423 +2.138831 -0.464294  
 H +2.344595 +1.773021 +0.333976  
 H -0.024265 -2.371231 +0.303216  
 H +2.352454 -2.217412 -0.003093  
 Br -2.169208 -0.187459 +0.188062

12  
 S1 min (CBr=2.8A,CCBr=119deg) -3017.759514  
 C +2.575721 -0.227511 +0.048165  
 N +1.817604 -1.387343 +0.112008  
 N +1.817212 +0.929795 -0.019866  
 C +0.411261 +1.070983 -0.033571  
 C -0.238859 -0.222096 +0.039953  
 C +0.429163 -1.384103 +0.109457  
 O +3.797684 -0.232333 +0.052002  
 O -0.108231 +2.174423 -0.099108  
 H +2.353097 +1.791062 -0.068135  
 H -0.047182 -2.357597 +0.165717  
 H +2.344171 -2.248447 +0.164055  
 Br -3.035882 -0.333468 +0.105214

## ADC(2) Geometries

The following geometries of 5-bromouracil were optimized with ADC(2)/def2-TZVP. The calculations were performed with TURBOMOLE 7.0.

12  
 S0 min ADC E -2986.073995  
 C +2.580674 -0.222147 +0.036374  
 N +1.814023 -1.370339 +0.104824  
 N +1.817193 +0.927940 +0.005355  
 C +0.424728 +1.063791 +0.033616  
 C -0.265098 -0.223943 +0.106217  
 C +0.444288 -1.372420 +0.138493  
 O +3.794622 -0.231873 +0.007035  
 O -0.100238 +2.158813 -0.000869  
 H +2.342075 +1.794628 -0.044994  
 H -0.031291 -2.343330 +0.192140  
 H +2.332558 -2.236405 +0.129566  
 Br -2.132197 -0.224563 +0.152016

12  
 S1 min -2985.947347  
 C +2.572216 -0.226718 +0.038338  
 N +1.821375 -1.366984 +0.116103  
 N +1.809927 +0.943550 +0.027503  
 C +0.432516 +0.923844 +0.043669  
 C -0.270760 -0.207235 +0.118585  
 C +0.432127 -1.444326 +0.203335  
 O +3.789193 -0.197498 -0.014156  
 O -0.083544 +2.232971 -0.010367  
 H +2.320046 +1.810850 -0.076092  
 H -0.032754 -2.414916 +0.111590  
 H +2.373857 -2.213003 +0.151728  
 Br -2.142862 -0.120382 +0.149536

12  
 T1 boat min E -2985.966263  
 C +2.517907 -0.222616 -0.062806  
 N +1.743334 -1.374048 -0.037749  
 N +1.816972 +0.929301 +0.263594  
 C +0.424199 +1.088814 +0.135863  
 C -0.275374 -0.170740 +0.223166  
 C +0.494635 -1.396974 +0.559840  
 O +3.702076 -0.234652 -0.336554  
 O -0.076090 +2.191878 -0.030395  
 H +2.357507 +1.784186 +0.186052  
 H +0.006360 -2.354462 +0.668371  
 H +2.269612 -2.224523 -0.199176  
 Br -1.959803 -0.296013 -0.510433

12  
 S2S1 CoIn -2985.921551 & -2985.921540  
 C +2.534856 -0.128550 -0.115879  
 N +1.752915 -1.308688 -0.092509  
 N +1.856915 +0.963640 +0.379559  
 C +0.444098 +1.068760 +0.252863  
 C -0.245267 -0.074812 +0.302333  
 C +0.542989 -1.362028 +0.493095  
 O +3.692705 -0.143471 -0.482678  
 O +0.006374 +2.282223 +0.006815  
 H +2.364813 +1.840400 +0.328151  
 H +0.212766 -2.245928 +1.026727  
 H +2.292815 -2.147233 -0.295139  
 Br -1.950788 -0.257452 -0.440057

12  
 S0S1 CoIn -2985.945232 & -2985.945075  
 C +2.040450 -0.247992 -0.279204  
 N +1.307104 -1.332946 +0.260589  
 N +1.576135 +0.994624 +0.105791  
 C +0.257923 +1.308362 +0.525088  
 C -0.496458 +0.103825 +0.893587  
 C +0.324405 -1.102057 +1.148600  
 O +3.029407 -0.434097 -0.952770  
 O -0.142133 +2.450119 +0.472938  
 H +2.121877 +1.772710 -0.252260  
 H +0.160186 -1.794935 +1.968451  
 H +1.779902 -2.227570 +0.165520  
 Br -1.767312 -0.290752 -0.483568

12  
 S1T2 MXP -2985.944987 & -2985.944989  
 C +2.570313 -0.223733 +0.041825  
 N +1.816065 -1.368019 +0.122823  
 N +1.814081 +0.942101 +0.025185  
 C +0.430302 +0.958256 +0.043548  
 C -0.268392 -0.189452 +0.134040  
 C +0.434873 -1.448717 +0.237373  
 O +3.787353 -0.212551 -0.011696  
 O -0.089620 +2.213654 -0.023108  
 H +2.323303 +1.808918 -0.087658  
 H -0.037603 -2.402791 +0.049902  
 H +2.371959 -2.212662 +0.157811  
 Br -2.131296 -0.144852 +0.169728

12  
 T2T1 CoIn -2985.946820 & -2985.946713  
 C +2.571396 -0.222908 +0.046384  
 N +1.817983 -1.368897 +0.124005  
 N +1.815480 +0.938099 -0.042528  
 C +0.428195 +0.967882 +0.019720  
 C -0.269654 -0.192639 +0.089747  
 C +0.432034 -1.446513 +0.129387  
 O +3.789550 -0.211470 +0.047727  
 O -0.095210 +2.208029 -0.011072  
 H +2.329937 +1.807479 -0.092495  
 H -0.040664 -2.414863 +0.093375  
 H +2.371379 -2.213114 +0.185408  
 Br -2.129954 -0.156321 +0.150339

12  
 S1 min (CBr=2.8A,CCBr=119deg) -2985.923206  
 C +2.561966 -0.232482 +0.048026  
 N +1.800741 -1.390520 +0.110880  
 N +1.813216 +0.934712 -0.023850  
 C +0.411727 +1.109726 -0.035023  
 C -0.189757 -0.202767 +0.038700  
 C +0.423150 -1.384774 +0.110211  
 O +3.776457 -0.243798 +0.054817  
 O -0.104855 +2.203596 -0.097974  
 H +2.366988 +1.785882 -0.069443  
 H -0.089616 -2.338709 +0.166642  
 H +2.326591 -2.252538 +0.165033  
 Br -2.980848 -0.414961 +0.107873

## MRCIS Geometries

The following geometries of 5-bromouracil were optimized with(10,8)/cc-pVDZ-DK. The calculations were performed with COLUMBUS 7.0. The orbitals came from a SA-CASSCF(10,8)/cc-pVDZ-DK calculation, averaging over four singlets and three triplets simultaneously. For the MRCI, the CAS(10,8) reference space was restricted to have at most two electrons in the three antibonding orbitals. 22 inner core orbitals were kept frozen in the MRCI step.

12  
 S0 min -3016.549508  
 C +2.574450 -0.219017 +0.036389  
 N +1.825363 -1.365782 +0.104347  
 N +1.828072 +0.929069 +0.005037  
 C +0.432268 +1.060167 +0.033578  
 C -0.264690 -0.224419 +0.106225  
 C +0.445286 -1.374716 +0.138568  
 O +3.766419 -0.227452 +0.007540  
 O -0.086893 +2.144120 -0.000555  
 H +2.351888 +1.781537 -0.044666  
 H -0.025482 -2.345242 +0.192082  
 H +2.341601 -2.219713 +0.128623  
 Br -2.166946 -0.218400 +0.152605

12  
 S1 min -3016.395668  
 C +2.569456 -0.225511 +0.035906  
 N +1.838669 -1.368012 +0.092070  
 N +1.822056 +0.938395 +0.011582  
 C +0.429273 +0.959343 +0.036300  
 C -0.269690 -0.210921 +0.090434  
 C +0.431750 -1.431660 +0.118589  
 O +3.762330 -0.195535 +0.008868  
 O -0.072698 +2.186075 +0.002519  
 H +2.342432 +1.789828 -0.036626  
 H -0.032394 -2.399892 +0.166972  
 H +2.378557 -2.207030 +0.109257  
 Br -2.178674 -0.173655 +0.125850

12  
 T1 min -3016.434611  
 C +2.533945 -0.225142 +0.035106  
 N +1.778337 -1.381540 +0.093391  
 N +1.801300 +0.914151 -0.223077  
 C +0.431107 +1.047647 +0.096186  
 C -0.286127 -0.203179 -0.000197  
 C +0.493219 -1.399435 -0.425470  
 O +3.713832 -0.225649 +0.183786  
 O -0.039142 +2.122535 +0.402020  
 H +2.334410 +1.760420 -0.157414  
 H +0.023502 -2.354227 -0.594668  
 H +2.316022 -2.221258 +0.176555  
 Br -1.889308 -0.408809 +0.963251

12  
 S2S1 CoIn -3016.365491 & -3016.365381  
 C +2.418778 -0.150099 +0.175104  
 N +1.613358 -1.290422 +0.155870  
 N +1.805746 +0.955506 -0.359270  
 C +0.397626 +1.114095 -0.246975  
 C -0.345117 -0.045038 -0.438495  
 C +0.456572 -1.300023 -0.548679  
 O +3.535827 -0.184035 +0.578735  
 O -0.015384 +2.266854 +0.034734  
 H +2.347690 +1.795356 -0.284497  
 H +0.032114 -2.246732 -0.846848  
 H +2.068746 -2.128093 +0.468190  
 Br -2.002719 -0.263886 +0.539666

```

12
S1T2 MXP -3016.392558 & -3016.392484
C +2.542485 -0.235116 +0.010844
N +1.807318 -1.365588 +0.078632
N +1.802180 +0.950274 -0.064450
C +0.427783 +0.948053 +0.150295
C -0.271978 -0.203843 +0.335231
C +0.406145 -1.398965 +0.316927
O +3.734190 -0.194134 -0.000419
O -0.031678 +2.214691 +0.073622
H +2.339464 +1.760556 +0.178062
H -0.050863 -2.364610 +0.442677
H +2.344631 -2.199227 +0.188270
Br -2.179136 -0.087942 +0.565407

```

```

12
T2T1 CoIn -3016.401632 & -3016.401202
C +2.546912 -0.231906 +0.024953
N +1.805390 -1.366340 +0.096412
N +1.815148 +0.945626 -0.058553
C +0.434141 +0.974150 +0.161032
C -0.271373 -0.190532 +0.326630
C +0.405801 -1.398699 +0.302479
O +3.739788 -0.212503 +0.012938
O -0.072236 +2.205454 +0.119208
H +2.357057 +1.769495 +0.110923
H -0.060963 -2.360451 +0.419981
H +2.340130 -2.202139 +0.202113
Br -2.169255 -0.108008 +0.556983

```

## 1 Other Geometries

This geometry was reported by Kobylecka et al.<sup>1</sup> as the  $S_0$  minimum of 5-bromouracil. It was computed at the CASSCF(12,10)/6-311G\* level of theory, using a non-relativistic Hamiltonian.

```

12
Kobylecka CASSCF(12,10)/6-311G*
C +0.000000 +0.000000 +0.000000
N +0.000000 +0.000000 +1.393026
N +1.280253 +0.000000 -0.530377
C +2.520387 +0.000000 +0.139797
C +2.367687 +0.000000 +1.601476
C +1.140042 +0.000000 +2.158851
O -1.012793 +0.000000 -0.659778
O +3.558429 +0.000000 -0.477993
H +1.331866 +0.000000 -1.540858
H +0.988397 +0.000000 +3.230359
H -0.911372 +0.000000 +1.824706
Br +3.934298 +0.000000 +2.662710

```

This geometry was optimized at the MP2/ANO-RCC-VDZP level of theory, using GAUSSIAN 09. The corresponding frequency calculation was employed for the generation of the initial conditions for the dynamics simulations.

```

12
Kobylecka CASSCF(12,10)/6-311G*
C +0.000000 +0.000000 +0.000000
N +0.000000 +0.000000 +1.393026
N +1.280253 +0.000000 -0.530377
C +2.520387 +0.000000 +0.139797
C +2.367687 +0.000000 +1.601476
C +1.140042 +0.000000 +2.158851
O -1.012793 +0.000000 -0.659778
O +3.558429 +0.000000 -0.477993
H +1.331866 +0.000000 -1.540858
H +0.988397 +0.000000 +3.230359
H -0.911372 +0.000000 +1.824706
Br +3.934298 +0.000000 +2.662710

```

## Supplementary References

- [1] Kobylecka M, Migani A, Asturiol D, Rak J, Blancafort L, 2009. Benign decay vs. photolysis in the photo-physics and photochemistry of 5-bromouracil. A computational study, *J. Phys. Chem. A* **113**, 5489–5495, [doi:10.1021/jp811330v](https://doi.org/10.1021/jp811330v).
